# Supplementary material for: Enhanced reversibility and electrochemical performances of mechanically alloyed Cu3P achieved by Fe addition
Source: Royal Society of Chemistry journal article supplement (doi:10.1039/c6ra01637e), 2016-01-01
Supplement: c6ra01637e1.pdf [file c6ra01637e1.pdf]

## Electronic Supplementary Information (ESI)

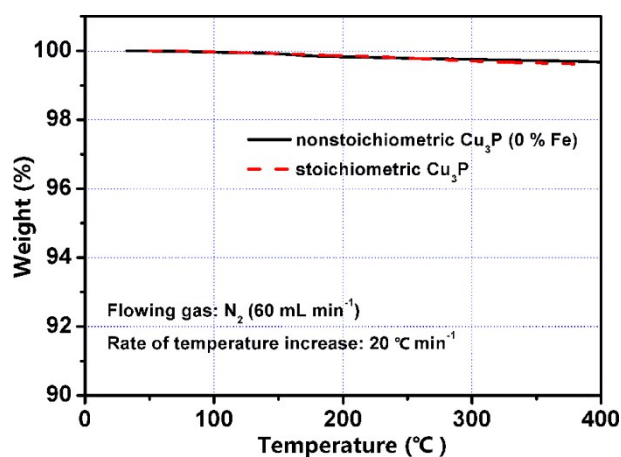

Fig. S1 TG curve of the ball-milled Cu<sub>3</sub>P powders.

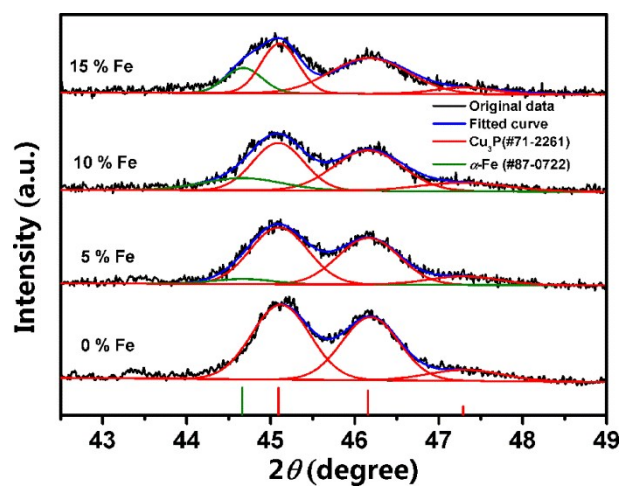

Fig. S2 Fitting results of the XRD patterns in the major peak region using two phases of Cu<sub>3</sub>P and α-Fe.

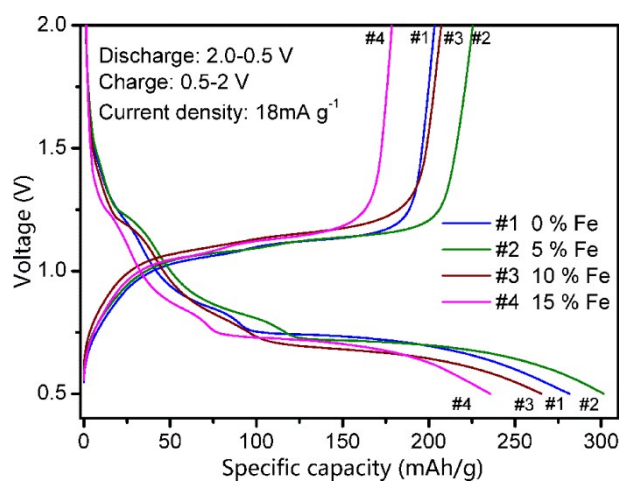

Fig. S3 Initial charge/discharge profiles of the Fe-added  $\text{Cu}_3\text{P}$  electrodes between 2.0 V and 0.5 V at the current density of  $18 \text{ mA g}^{-1}$  (0.075 C).

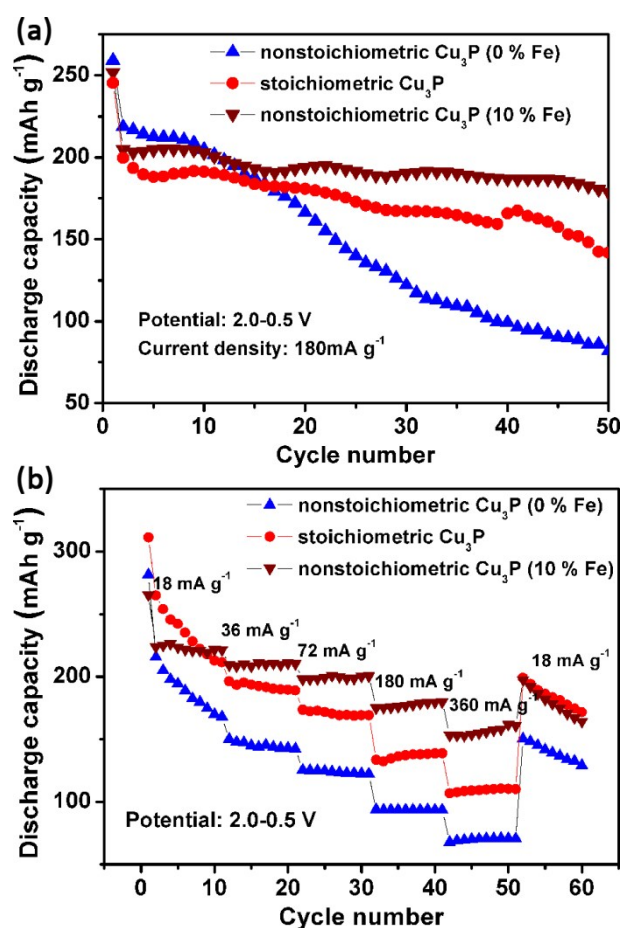

Fig. S4 Comparison of the electrochemical performances of the electrodes made of nonstoichiometric  $\text{Cu}_3\text{P}$  with/without Fe-addition and stoichiometric  $\text{Cu}_3\text{P}$  obtained by increasing P amounts for wet ball milling.
